# Supplementary material
Source: PubMed Central journal article supplement (PMC5069606)
Supplement: JNC-137-460-s001.pdf [file JNC-137-460-s001.pdf]

Supporting information for:

**Acylated but not des-acyl ghrelin is neuroprotective in an MPTP mouse model of Parkinson's Disease**

Jacqueline A Bayliss<sup>1</sup>, Moyra Lemus<sup>1</sup>, Vanessa V Santos<sup>1</sup>, Minh Deo<sup>1</sup>, John Elsworth<sup>2</sup>, Zane B. Andrews<sup>1</sup>

1. Department of Physiology, School of Biomedical and Psychological Sciences, Monash University, Clayton, Melbourne, Vic., 3800, Australia.

2. Department of Psychiatry, Yale University School of Medicine, New Haven, Connecticut 06520.

## Results

### Supplementary Figure 1

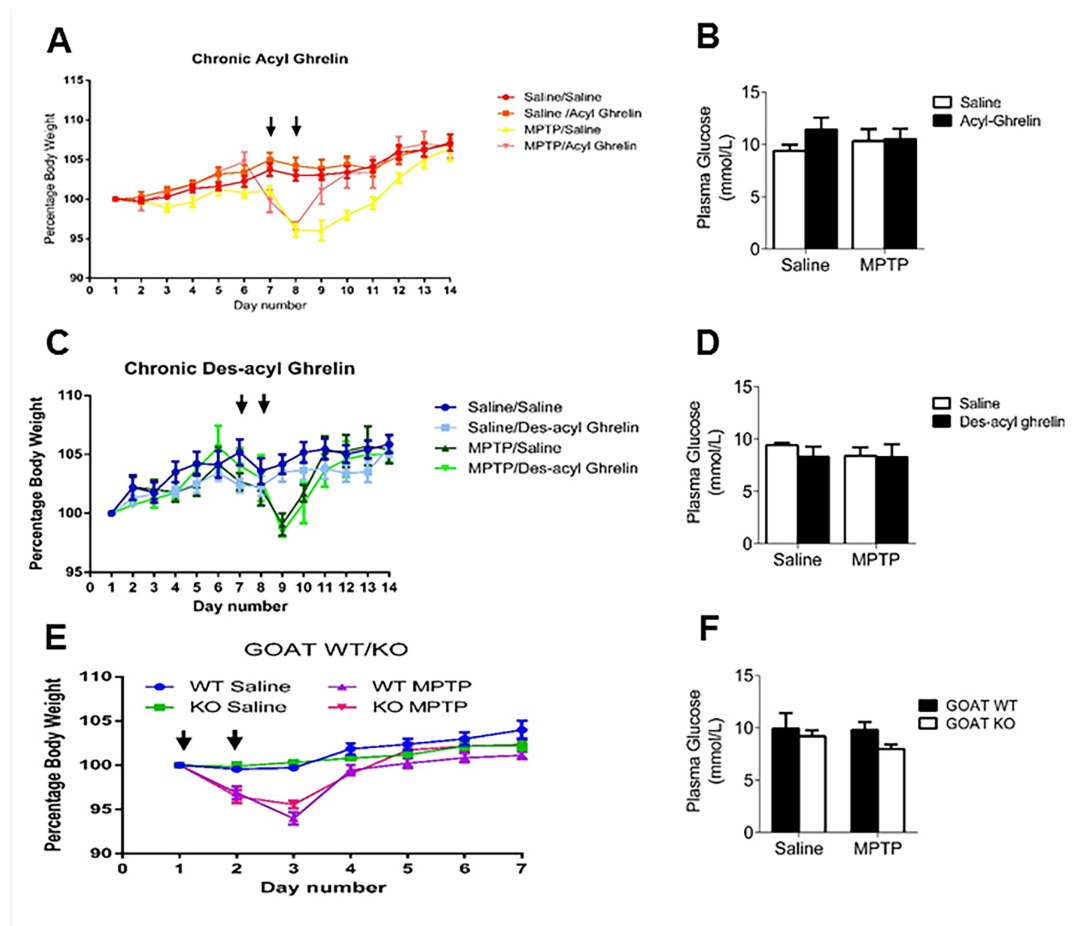

**Supplementary Figure 1.** Body weight and blood glucose graphs in Ghrelin KO mice reinstated with acylated or des-acylated ghrelin and GOAT WT/KO mice. **A & B**, Ghrelin KO mice chronically treated with acylated ghrelin did not significantly change body weight or blood glucose. **C & D**, Ghrelin KO mice chronically treated with des-acyl ghrelin did not significantly change body weight or blood glucose. **E & F**, There was no significant difference between GOAT WT and KO mice in terms of body weight or blood glucose measurements. Data are represented as mean  $\pm$  SEM (n=8-14, two-way ANOVA,  $p < 0.05$ ).
